# Supplementary material for: Impact of COVID-19 Infection and Persistent Lingering Symptoms on Patient Reported Indicators of Nutritional Risk and Malnutrition
Source: MDPI journal article supplement (doi:10.3390/nu14030642), 2022-02-02
Supplement: s1 [file s1]

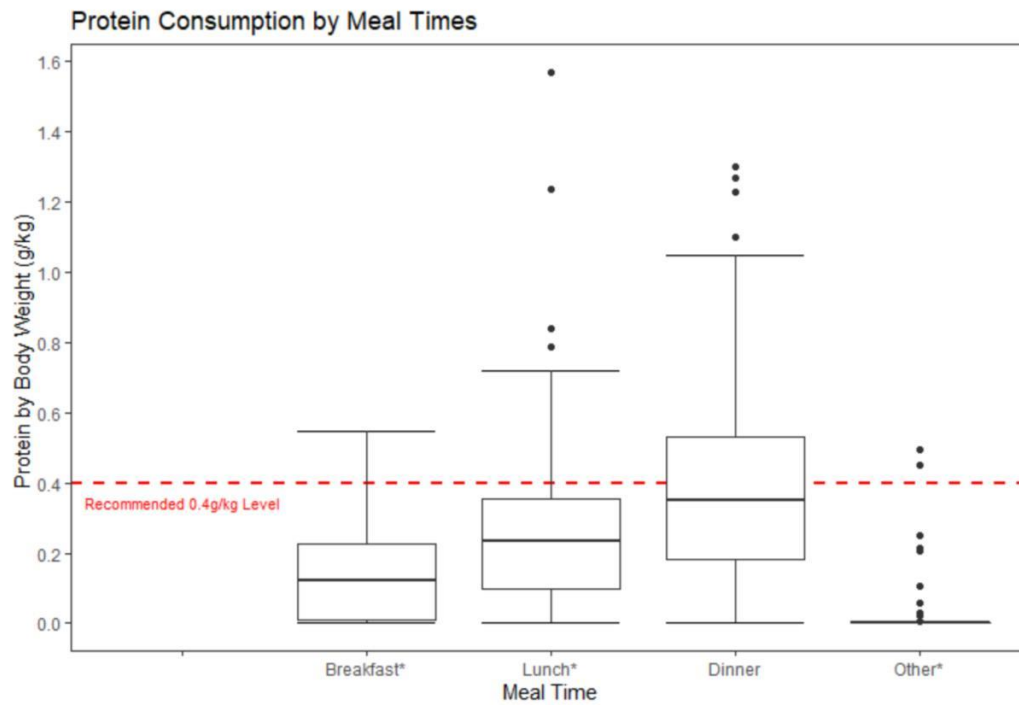

**Figure S1.** Protein consumption by meal times (g protein/kg BW). Per meal consumption of protein per kg of body weight was: breakfast  $0.14 \pm 0.1$ , lunch  $0.28 \pm 0.3$ , dinner  $0.39 \pm 0.3$ , and other  $0.02 \pm 0.1$ . Protein consumption at breakfast, lunch, and other were significantly different ( $p < 0.0001$ ) than the 0.4g/kg threshold, while dinner was not significantly different ( $p = .736$ ). Only 3.3% of participants met the threshold at breakfast, 22.8% at lunch, and 42.4% at dinner. One participant (1.1%) met the 0.4 g/kg threshold for three meals, 13 (14.3%) met the threshold for two meals, 51 (55.4%) met it for at least one meal, and 41 (44.6%) of the participants did not meet the threshold at any meal.

**Table S1.** Protein consumption meeting per meal recommendation (g/kg BW) by meal time.

| Meal      | Met per meal recommendation<br>$\geq 0.4\text{g/kg}$ ; n(%) |
|-----------|-------------------------------------------------------------|
| Breakfast | 3 (3.3%)                                                    |
| Lunch     | 21 (22.8%)                                                  |
| Dinner    | 39 (42.4%)                                                  |
| Other     | 2 (2.2%)                                                    |

Notes: g, grams kg, kilograms.

**Table S2.** Average protein consumption to weight comparison of current recommendations (g/kg).

| Recommendations<br>(Protein g/kg BW) | Average<br>consumption | Range       | Met<br>recommendations,<br>n(%) | p-value           |
|--------------------------------------|------------------------|-------------|---------------------------------|-------------------|
| Current RDA (0.8 g/kg) [13]          | $0.83 \pm 0.4$         | 0.10 – 2.78 | 39 (43.4%)                      | 0.460             |
| Proposed standard (1.2 g/kg)[16]     | $0.83 \pm 0.4$         | 0.10 – 2.78 | 16 (17.4%)                      | <b>&lt;0.0001</b> |

Notes: p-value <0.05 indicates statistical significance across groups. RDA, recommended daily allowance; BW, body weight; kg, kilograms.
